# Supplementary material for: From Childhood Residential Green space to Adult Mental Wellbeing: A Pathway Analysis among Chinese Adults
Source: MDPI journal article supplement (doi:10.3390/bs12030084), 2022-03-17
Supplement: s1 [file s1]

# Supplemental materials

C1

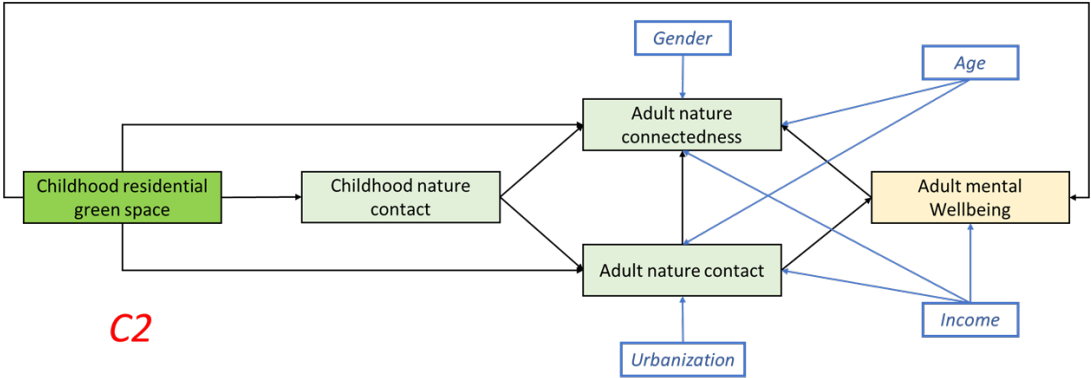

C2

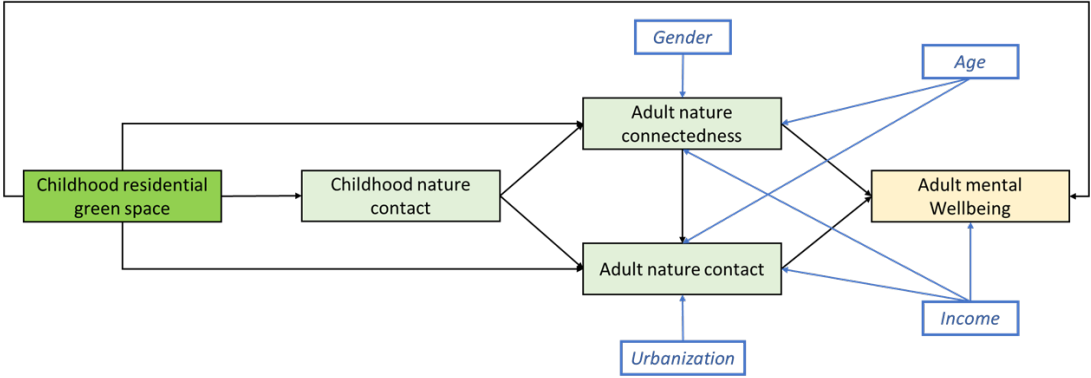

Figure S1. Competing models

Table S1. Model fits of competing models

| Model       | $\chi^2/df$ | GFI  | AGFI | CFI  | RMSEA | AIC    | BIC    |
|-------------|-------------|------|------|------|-------|--------|--------|
| Final model | 2.97        | 0.99 | 0.96 | 0.98 | 0.05  | 99.67  | 262.30 |
| Model C1    | 3.17        | 0.99 | 0.96 | 0.98 | 0.05  | 101.69 | 264.31 |
| Model C2    | 3.40        | 0.99 | 0.96 | 0.98 | 0.06  | 104.03 | 266.65 |
